# Supplementary material for: The Integration of Psychosocial Care into National Dementia Strategies across Europe: Evidence from the Skills in DEmentia Care (SiDECar) Project
Source: Int J Environ Res Public Health. 2021 Mar 25;18(7):3422. doi: 10.3390/ijerph18073422 (PMC8036745; doi:10.3390/ijerph18073422)
Supplement: Supplementary file 1 [file ijerph-18-03422-s001.pdf]

**Supplementary Table S1: Coding structure with categories, subcategories and codes.**

| Categories | Subcategories                       | Codes                                                                                                                                                                                                                                                                                                                                                                                                                                    |
|------------|-------------------------------------|------------------------------------------------------------------------------------------------------------------------------------------------------------------------------------------------------------------------------------------------------------------------------------------------------------------------------------------------------------------------------------------------------------------------------------------|
| Treatment  | Person-centred conceptual framework | <ul style="list-style-type: none"> <li>○ Patient as a person</li> <li>○ Identity</li> <li>○ Needs assessment</li> <li>○ Empowerment</li> <li>○ Autonomy</li> <li>○ Inclusion in society</li> <li>○ Engagement</li> <li>○ Meaningful life</li> <li>○ Tailored support</li> <li>○ Agency</li> <li>○ Shared decision making</li> </ul>                                                                                                      |
|            | Psychosocial interventions          | <ul style="list-style-type: none"> <li>○ Psychosocial interventions recommended</li> <li>○ Targets of psychosocial interventions</li> <li>○ Dementia-friendly environments</li> <li>○ Adaptation of physical environment</li> <li>○ Assistive technology</li> </ul>                                                                                                                                                                      |
|            | Health and social services networks | <ul style="list-style-type: none"> <li>○ Service partnerships</li> <li>○ Provision of various services</li> <li>○ Multiprofessional teams</li> <li>○ Resource sharing</li> <li>○ Integration of services</li> <li>○ Easy access to services</li> <li>○ Coordination of service delivery</li> </ul>                                                                                                                                       |
| Education  |                                     | <ul style="list-style-type: none"> <li>○ Education and training programs</li> <li>○ Target groups</li> <li>○ Evidence-based programs</li> <li>○ Flexible programs</li> <li>○ Person-centred programs</li> <li>○ Program content</li> <li>○ Education based on common guidelines</li> <li>○ Continuing education</li> <li>○ Education for clinical practice</li> <li>○ Education for society</li> <li>○ ABC education programs</li> </ul> |
| Research   |                                     | <ul style="list-style-type: none"> <li>○ Need for research</li> <li>○ Effectiveness studies</li> <li>○ Implementation research</li> <li>○ Ecological studies</li> <li>○ Research and innovations in healthcare</li> <li>○ Research and innovations in technology</li> </ul>                                                                                                                                                              |
